# Supplementary material for: Graphene nanoribbons/Ru as efficient cathodic catalysts for high-performance rechargeable Li–CO2 batteries
Source: Royal Society of Chemistry journal article supplement (doi:10.1039/d4ta00716f), 2024-01-01
Supplement: d4ta00716f1.pdf [file d4ta00716f1.pdf]

## Supporting Information

### Graphene Nanoribbons/Ru as Efficient Cathodic Catalysts for High-Performance Rechargeable Li-CO<sub>2</sub> Batteries

*Xiaoling Ye,<sup>a</sup> Wencheng Liu,<sup>a</sup> Yan Lu,<sup>b</sup> Xiaoxiao Zheng,<sup>a</sup> Yijian Bi,<sup>a</sup> Min Zheng,<sup>c</sup> Lei Han,<sup>a</sup> Benqing Liu,<sup>a</sup> Yafei Ning,<sup>a,d</sup> Syed Hassan Mujtaba Jafri,<sup>e,f</sup> Xinyu Zhao,<sup>\*g</sup> Shangming He <sup>\*h</sup> Shilin Zhang<sup>\*c</sup> and Hu Li<sup>\*a,d</sup>*

<sup>a</sup> Shandong Technology Centre of Nanodevices and Integration, School of Integrated circuit, Shandong University, Jinan 250101, China.

<sup>b</sup> State Key Lab of High Performance Ceram and Superfine Microstructure, Shanghai Institute of Ceramics, Chinese Academy of Science, Shanghai 200050, P.R. China.

<sup>c</sup> School of Chemical Engineering, The University of Adelaide, Adelaide, SA 5000, Australia.

<sup>d</sup> Shenzhen Research Institute of Shandong University, Shenzhen, 518063, China.

<sup>e</sup> Department of Electrical Engineering, Mirpur University of Science and Technology, Mirpur Azad Jammu and Kashmir 10250, Pakistan.

<sup>f</sup> Department of Materials Science and Engineering Uppsala University, 75121 Uppsala, Sweden.

<sup>g</sup> Center for Orthopaedic Science and Translational Medicine, Department of Orthopaedics, Shanghai Tenth People's Hospital, School of Medicine, Tongji University, 301 Yanchang Road, Shanghai 200072, People's Republic of China.

<sup>h</sup> Shanghai Synchrotron Radiation Facility (SSRF), Shanghai Advanced Research Institute (SARI), and Shanghai Institute of Applied Physics, Chinese Academy of Sciences (CAS), 201204 Shanghai, P. R. China.

**Table S1.** Comparison of GNR Conductivity Before and After Annealing

|                  | Temperature (°C) | Resistivity ( $\Omega\cdot\text{cm}$ ) | Conductivity ( $\text{S cm}^{-1}$ ) |
|------------------|------------------|----------------------------------------|-------------------------------------|
| Before Annealing | 25               | 0.085                                  | 11.764                              |
| After Annealing  | 25               | 0.043                                  | 23                                  |

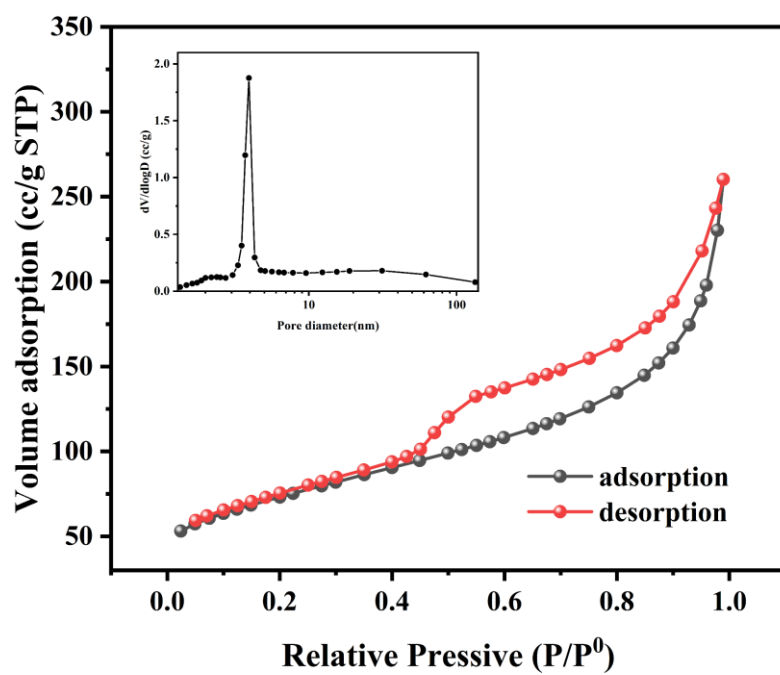

**Fig. S1** N<sub>2</sub> adsorption–desorption isotherms of GNR (inset is the pore size distribution).

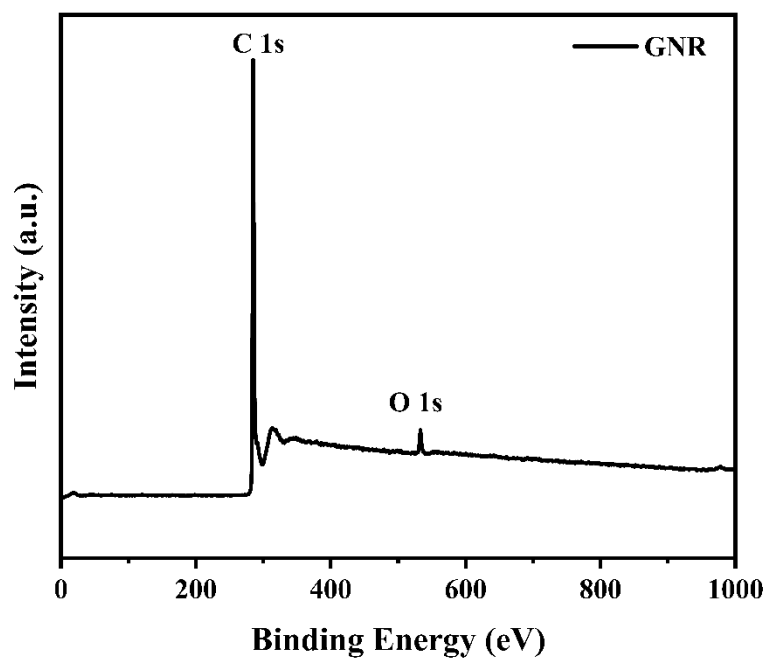

**Fig. S2** Full X-ray photoelectron spectroscopy of GNR.

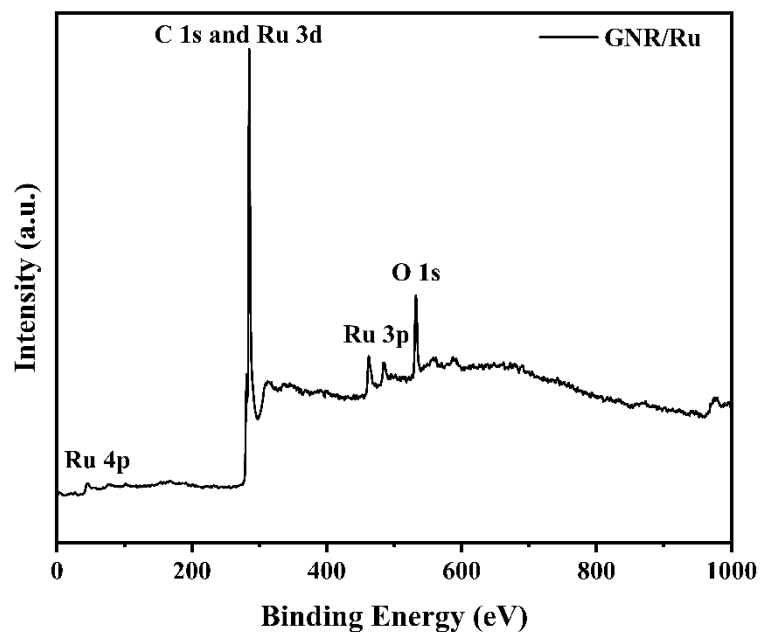

**Fig. S3** Full X-ray photoelectron spectroscopy of GNR/Ru.

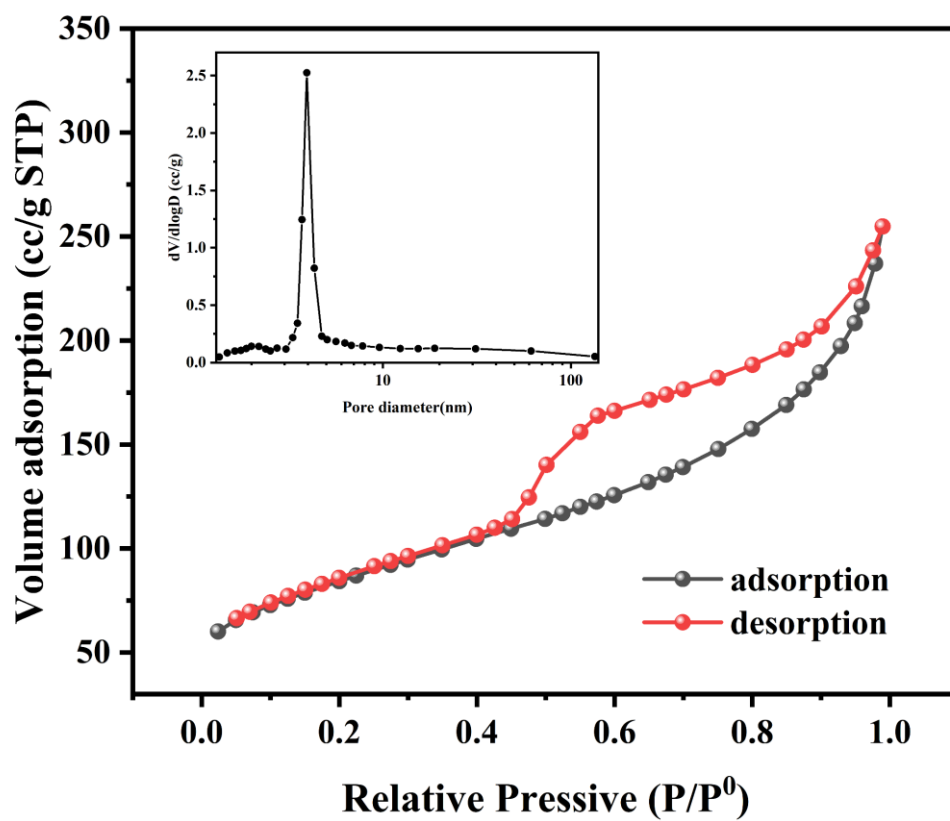

**Fig. S4** N<sub>2</sub> adsorption–desorption isotherms of GNR/Ru catalyst.

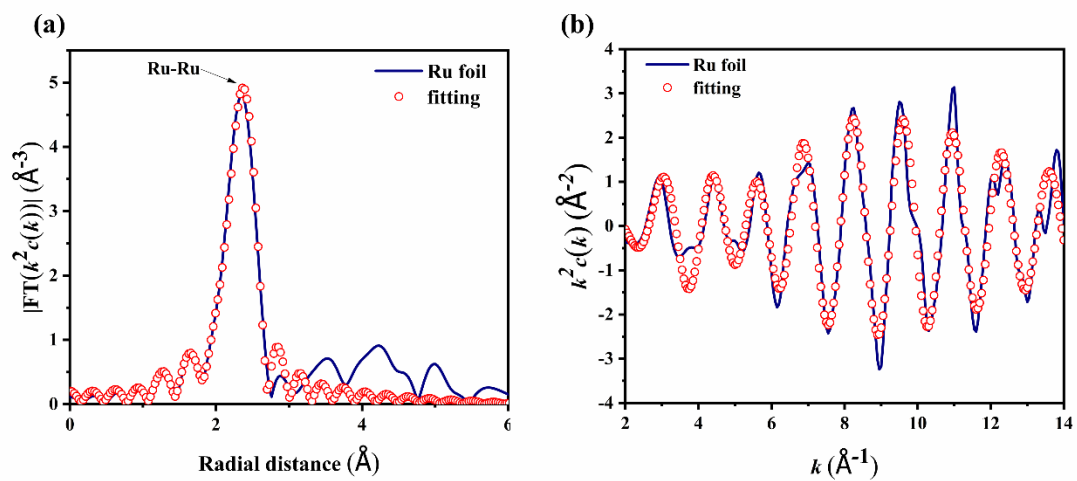

**Fig. S5** (a) Fitting of the magnitude of the Fourier transform of the  $k^2$ -weighted EXAFS and (b) the corresponding  $k^2$ -weighted oscillation fitting curves (data-blue and fit-red) for Ru foil.

**Table S2.** EXAFS data fitting results of Samples.

| Sample                      | Path  | $CN^a$  | $R(\text{\AA})^b$ | $\sigma^2 (\text{\AA}^2)^c$ | $\Delta E_0(\text{eV})^d$ | $R$ factor |
|-----------------------------|-------|---------|-------------------|-----------------------------|---------------------------|------------|
| Ru K-edge ( $S_0^2=0.905$ ) |       |         |                   |                             |                           |            |
| Ru foil                     | Ru-Ru | 12*     | 2.672±0.003       | 0.0041                      | -5.0                      | 0.0052     |
| GNR/Ru                      | Ru-C  | 3.7±0.8 | 2.026±0.012       | 0.0015                      | -12.25                    | 0.0038     |
|                             | Ru-Ru | 5.1±0.4 | 2.668±0.003       | 0.0032                      | -3.3                      |            |

<sup>a</sup> $CN$ , coordination number; <sup>b</sup> $R$ , the distance between absorber and backscatter atoms; <sup>c</sup> $\sigma^2$ , the Debye Waller factor value; <sup>d</sup> $\Delta E_0$ , inner potential correction to account for the difference in the inner potential between the sample and the reference compound;  $R$  factor indicates the goodness of the fit.  $S_0^2$  was fixed to 0.905, according to the experimental EXAFS fit of Ru foil by fixing  $CN$  as the known crystallographic value. \* This value was fixed during EXAFS fitting, based on the known structure of Ru. Fitting conditions:  $k$  range: 3.0 - 14.0;  $R$  range: 1.0 - 3.0; fitting space: R space;  $k$ -weight = 2. A reasonable range of EXAFS fitting parameters:  $0.800 < S_0^2 < 1.000$ ;  $CN > 0$ ;  $\sigma^2 > 0 \text{ \AA}^2$ ;  $|\Delta E_0| < 15 \text{ eV}$ ;  $R$  factor  $< 0.02$ .



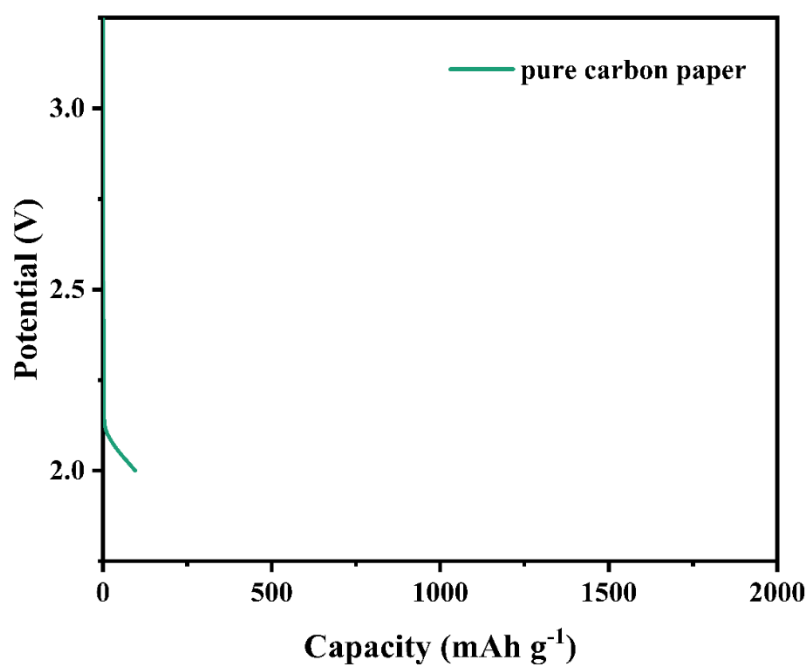

**Fig. S6** Full discharge profiles of catalyst-free carbon paper.

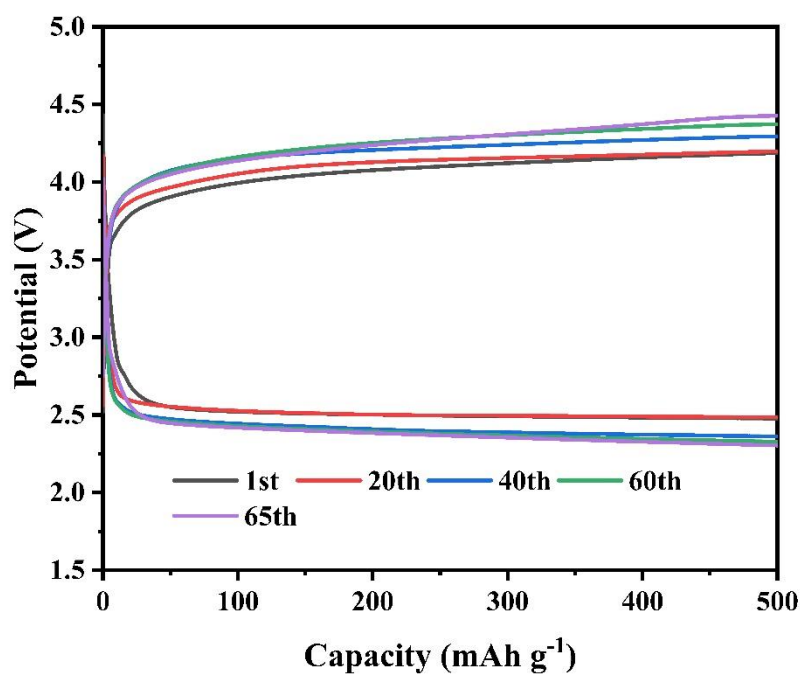

**Fig. S7** Selected discharge-charge curves for LCBs with the GNR cathode.

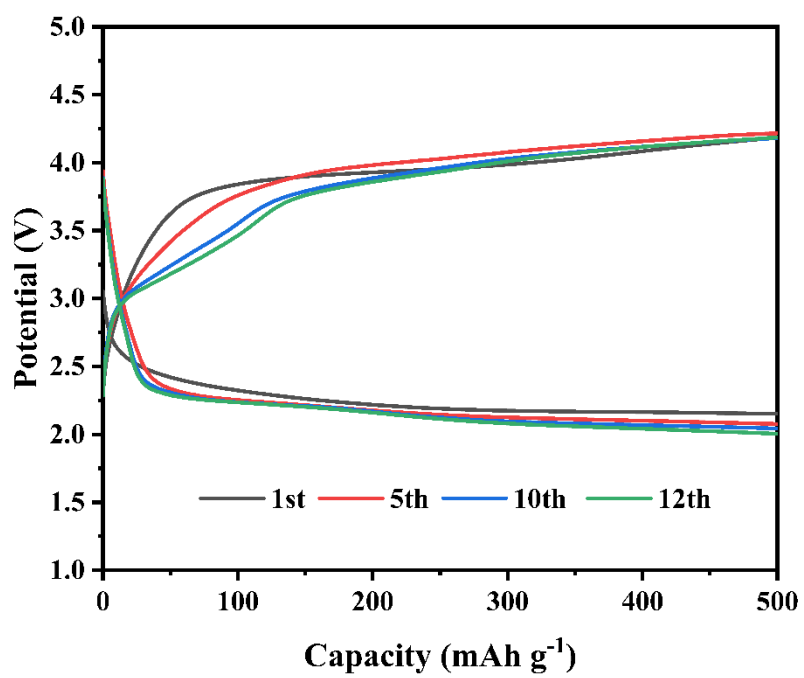

**Fig. S8** Selected discharge-charge curves for LCBs with the SWCNT cathodes.

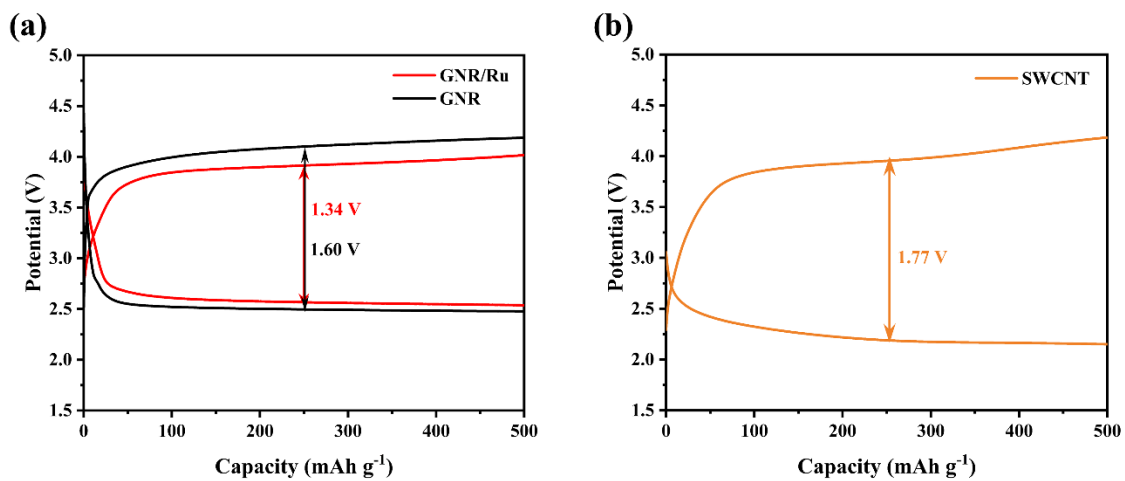

**Fig. S9** Cycling overpotentials of (a) GNR/Ru, GNR and (b) SWCNT.

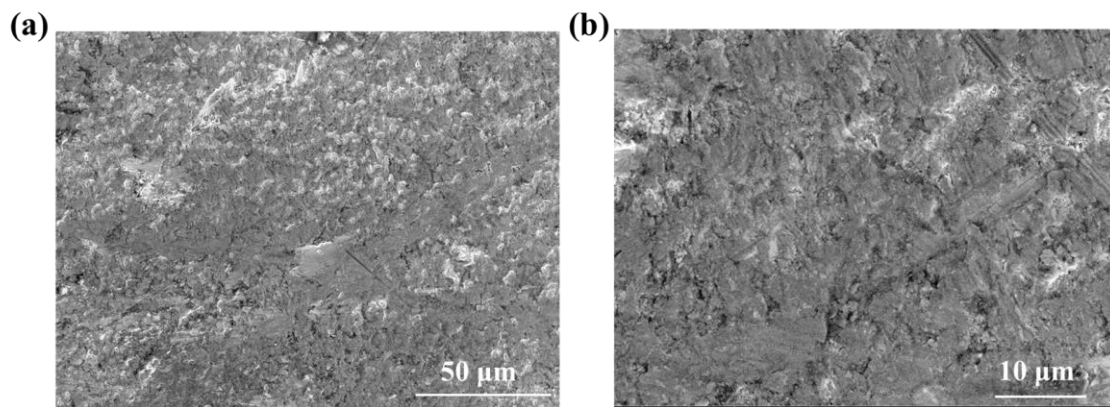

**Fig. S10.** SEM images of GNR/Ru cathode after long cycles.

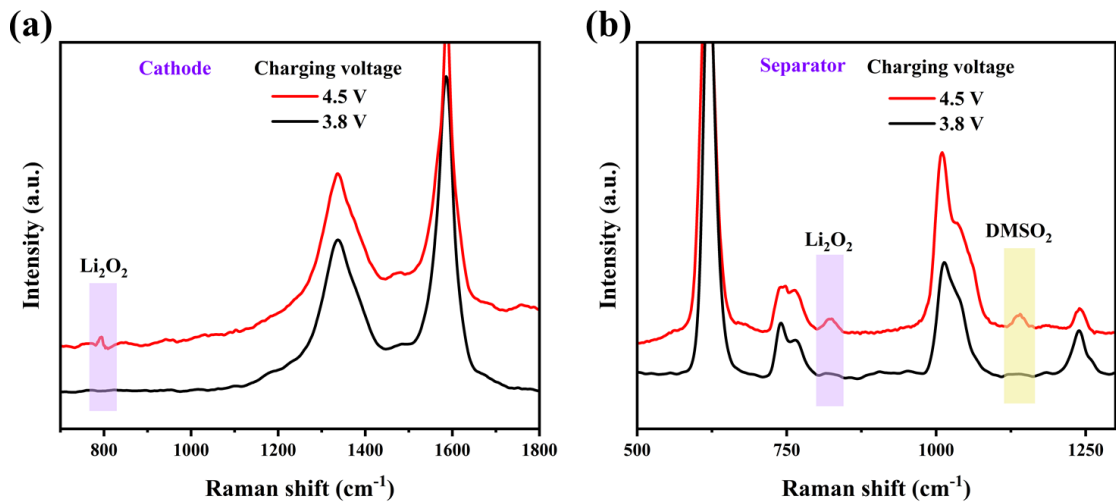

**Fig. S11** Raman spectra of (a) Cathode and (b) Separator at different charging voltage.

**Table S3.** The electrochemical performances comparisons of different LCBs reported in the literature.

| <b>Cathodes Material</b>                                | <b>Discharge capacity (mAh g<sup>-1</sup>)</b> | <b>Over-potential (V)</b>                | <b>Battery operation time (h)</b>        | <b>References</b> |
|---------------------------------------------------------|------------------------------------------------|------------------------------------------|------------------------------------------|-------------------|
| <b>GNR/Ru</b>                                           | <b>11470</b><br>(100 mA g <sup>-1</sup> )      | <b>1.34</b><br>(100 mA g <sup>-1</sup> ) | <b>1240</b><br>(100 mA g <sup>-1</sup> ) | <b>This work</b>  |
| CNT/Ru                                                  | 4541<br>(100 mA g <sup>-1</sup> )              | 1.24 V<br>(100 mA g <sup>-1</sup> )      | 450<br>(100 mA g <sup>-1</sup> )         | [1]               |
| RuCo/CNFs                                               |                                                | 0.98<br>(100 mA g <sup>-1</sup> )        | 360<br>(500 mA g <sup>-1</sup> )         | [2]               |
| Ru/ACNFs                                                |                                                | 1.35<br>(100 mA g <sup>-1</sup> )        | 1000<br>(100 mA g <sup>-1</sup> )        | [3]               |
| CNT@RuO <sub>2</sub>                                    | 2187<br>(50 mA g <sup>-1</sup> )               | ~1.4<br>(100 mA g <sup>-1</sup> )        | 1100<br>(50 mA g <sup>-1</sup> )         | [4]               |
| NiPc-CN MDE                                             | 18000<br>(200mA g <sup>-1</sup> )              | 1.4<br>(50 mA g <sup>-1</sup> )          | 1200<br>(50 mA g <sup>-1</sup> )         | [5]               |
| Co <sub>0.1</sub> Ni <sub>0.9</sub> O <sub>x</sub> /CNT | 5871.41<br>(100 mA g <sup>-1</sup> )           | 1.27<br>(100 mA g <sup>-1</sup> )        | 500<br>(100 mA g <sup>-1</sup> )         | [6]               |
| Au/CNT                                                  | 6399<br>(100 mA g <sup>-1</sup> )              | 1.53<br>(100 mA g <sup>-1</sup> )        | 460<br>(200 mA g <sup>-1</sup> )         | [7]               |
| MXene/GO                                                | 18326<br>(100 mA g <sup>-1</sup> )             | 2.4<br>(100 mA g <sup>-1</sup> )         | 430<br>(100 mA g <sup>-1</sup> )         | [8]               |
| Ti <sub>3</sub> C <sub>2</sub> T <sub>x</sub>           |                                                | 1.38                                     | 1000                                     | [9]               |
| MXene/CNT                                               |                                                | (200 mA g <sup>-1</sup> )                | (200 mA g <sup>-1</sup> )                |                   |
| Cu-NG                                                   |                                                | 0.77<br>(100 mA g <sup>-1</sup> )        | 500<br>(200 mA g <sup>-1</sup> )         | [10]              |
| NG/RGO                                                  |                                                | 2.21<br>(500 mA g <sup>-1</sup> )        | 390<br>(500 mA g <sup>-1</sup> )         | [11]              |
| CQD/hG                                                  | 12300<br>(50 mA g <sup>-1</sup> )              | 1.02<br>(100 mA g <sup>-1</sup> )        | 235<br>(1.0 A g <sup>-1</sup> )          | [12]              |
| α-MnO <sub>2</sub> /CNT                                 | 7134.1<br>(50 mA g <sup>-1</sup> )             | 1.4<br>(100 mA g <sup>-1</sup> )         | 1000<br>(100 mA g <sup>-1</sup> )        | [13]              |

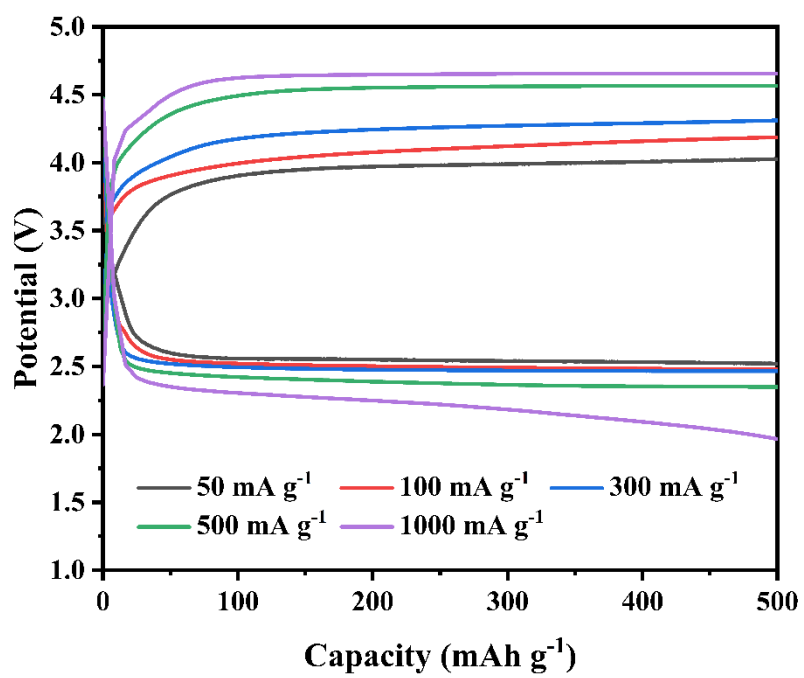

**Fig. S12** GNR cathodes at different current densities.



## References

1. K. V. Savunthari, C.-H. Chen, Y.-R. Chen, Z. Tong, K. Iputera, F.-M. Wang, C.-C. Hsu, D.-H. Wei, S.-F. Hu and R.-S. Liu, *ACS Applied Materials & Interfaces*, 2021, **13**, 44266-44273.
2. Y. Jin, F. Chen and J. Wang, *ACS Sustainable Chemistry & Engineering*, 2020, **8**, 2783-2792.
3. Y. Qiao, S. Xu, Y. Liu, J. Dai, H. Xie, Y. Yao, X. Mu, C. Chen, D. J. Kline, E. M. Hitz, B. Liu, J. Song, P. He, M. R. Zachariah and L. Hu, *Energy & Environmental Science*, 2019, **12**, 1100-1107.
4. S. Bie, M. Du, W. He, H. Zhang, Z. Yu, J. Liu, M. Liu, W. Yan, L. Zhou and Z. Zou, *ACS Applied Materials & Interfaces*, 2019, **11**, 5146-5151.
5. H. Zheng, H. Li, Z. Zhang, X. Wang, Z. Jiang, Y. Tang, J. Zhang, B. Emley, Y. Zhang, H. Zhou, Y. Yao and Y. Liang, *Small*, 2023, **19**, 2302768.
6. M. S. Choi, A. Nipane, B. S. Y. Kim, M. E. Ziffer, I. Datta, A. Borah, Y. Jung, B. Kim, D. Rhodes, A. Jindal, Z. A. Lamport, M. Lee, A. Zangiabadi, M. N. Nair, T. Taniguchi, K. Watanabe, I. Kymissis, A. N. Pasupathy, M. Lipson, X. Zhu, W. J. Yoo, J. Hone and J. T. Teherani, *Nature Electronics*, 2021, **4**, 731-739.
7. Y. Kong, H. Gong, L. Song, C. Jiang, T. Wang and J. He, *European Journal of Inorganic Chemistry*, 2021, **2021**, 590-596.
8. A. Bharti, G. Manna, P. Saha, G. Achutarao and A. J. Bhattacharyya, *The Journal of Physical Chemistry Letters*, 2022, **13**, 7380-7385.
9. Z. Hu, Y. Xie, D. Yu, Q. Liu, L. Zhou, K. Zhang, P. Li, F. Hu, L. Li, S. Chou and S. Peng, *ACS Nano*, 2021, **15**, 8407-8417.
10. Z. Zhang, Z. Zhang, P. Liu, Y. Xie, K. Cao and Z. Zhou, *Journal of Materials Chemistry A*, 2018, **6**, 3218-3223.
11. B. Chen, D. Wang, B. Zhang, X. Zhong, Y. Liu, J. Sheng, Q. Zhang, X. Zou, G. Zhou and H.-M. Cheng, *ACS Nano*, 2021, **15**, 9841-9850.
12. Y. Jin, C. Hu, Q. Dai, Y. Xiao, Y. Lin, J. W. Connell, F. Chen and L. Dai, *Advanced Functional Materials*, 2018, **28**, 1804630.
13. D. Lei, S. Ma, Y. Lu, Q. Liu and Z. Li, *Journal of Electronic Materials*, 2019, **48**, 4653-4659.
